# Supplementary material for: Combustion characterization and modeling of novel nanoenergetic composites of Co3O4/nAl
Source: Royal Society of Chemistry journal article supplement (doi:10.1039/c4ra14751k), 2015-01-01
Supplement: c4ra14751k1.pdf [file c4ra14751k1.pdf]

## Supporting Information

### Combustion Characterization and Modeling of Novel Nanoenergetic Composites of $\text{Co}_3\text{O}_4/\text{nAl}$

Vinay Kumar Patel<sup>1</sup>, Jayant Raj Saurav<sup>1</sup>, Keshab Gangopadhyay<sup>3</sup>, Shubhra Gangopadhyay<sup>3</sup>,  
Shantanu Bhattacharya<sup>1</sup>

<sup>1</sup>Microsystems Fabrication Laboratory, <sup>1</sup>Department of Mechanical Engineering,

<sup>1</sup>Indian Institute of Technology Kanpur, UP, India

<sup>2</sup>Department of Electrical and Computer Engineering, University of Missouri Columbia, MO  
USA

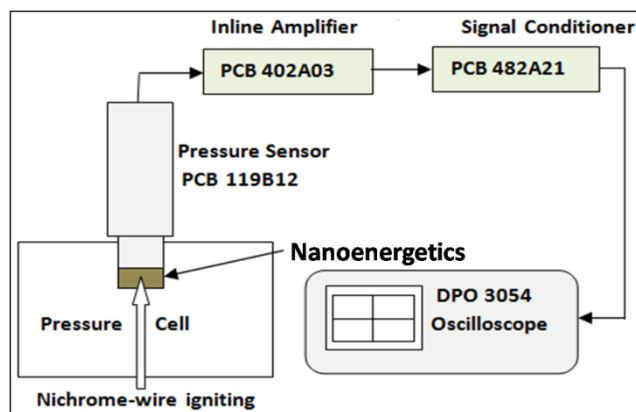

**Figure S1.** Pressure-time characteristics measuring set-up

**Table S1.** Reactive mass distribution of Co<sub>3</sub>O<sub>4</sub>/nAl nanoenergetics at equivalence ratio of 1.6

| Mass of<br>nanoenergetics<br>excluding Al <sub>2</sub> O <sub>3</sub> (mg) | %<br>Al <sub>2</sub> O <sub>3</sub> | Al<br>(mg) | Co <sub>3</sub> O <sub>4</sub><br>(mg) |
|----------------------------------------------------------------------------|-------------------------------------|------------|----------------------------------------|
| 26.360                                                                     | 46.56                               | 6.063      | 20.297                                 |

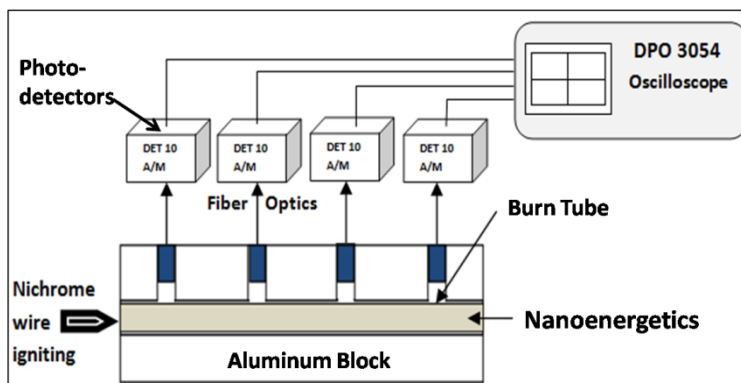

**Figure S2.** Combustion wave speed measuring set-up

**Table S2.** Combustion front-wave speed and pressure-time measurements of  $\text{Co}_3\text{O}_4/\text{nAl}$  and  $\text{Co}_3\text{O}_4\text{-400/nAl}$  nanoenergetics

| Nanoenergetic Composites               | Equivalence ratio ( $\phi$ ) | Combustion front-wave speed (m/sec) | Pressure-time measurements |                                           |
|----------------------------------------|------------------------------|-------------------------------------|----------------------------|-------------------------------------------|
|                                        |                              |                                     | Peak pressure (MPa)        | Pressurization rate (MPa/ $\mu\text{s}$ ) |
| $\text{Co}_3\text{O}_4/\text{nAl}$     | 1.4                          | 480 $\pm$ 25                        | 19.8 $\pm$ 2               | 0.11 $\pm$ 0.05                           |
|                                        | 1.6                          | 625 $\pm$ 50                        | 20 $\pm$ 2                 | 0.14 $\pm$ 0.05                           |
|                                        | 1.8                          | 781 $\pm$ 50                        | 12.6 $\pm$ 1               | 0.08 $\pm$ 0.05                           |
| $\text{Co}_3\text{O}_4\text{-400/nAl}$ | 1.4                          | 590 $\pm$ 50                        | 26 $\pm$ 2                 | 0.29 $\pm$ 0.1                            |
|                                        | 1.6                          | 830 $\pm$ 75                        | 32.6 $\pm$ 3               | 0.47 $\pm$ 0.1                            |
|                                        | 1.8                          | 760 $\pm$ 50                        | 30.4 $\pm$ 3               | 0.38 $\pm$ 0.1                            |
